# Supplementary material for: Clinical Efficacy and Patient-Reported Outcomes of Coconut Oil as Adjunctive Periodontitis Treatment: Triple-Blinded Randomized Trial
Source: Research Square preprint supplement (doi:10.21203/rs.3.rs-6038491/v1), 2025-03-13
Supplement: Supplementary file 1 [file ad1ebcef6076f8519548789c.xlsx]

## Sheet: Hoja2
ID patient	Sex	Age	Periodontal status	Rinse	PH 1º visit	PH 2º visit	PH 3º visit	Color 1º visit -Tooth1	Color 2º visit -Tooth1	Color 3º visit -Tooth 1	1º Breath (H2S)	1º Breath (CH3SH)	1º Breath (CH3)S2	2ºBreath (H2S)	2ºBreath (CH3SH)	2ºBreath (CH3)S2	3º Breath (H2S)	3º Breath (CH3SH)	3º Breath (CH3)2S	1º BOP (%)	2º BOP (%)	3ºBOP (%)	1ºPlaque (%)	2ºPlaque (%)	3ºPlaque (%)	1ºPD (mm)	2ºPD (mm)	3ºPD (mm)	1ºCAL (mm)	2ºCAL (mm)	3ºCAL (mm)	VAS 1 (Sensitivity)	VAS 1 (Pain)	VAS 1 (Dryness)	VAS 2 (Sensitivity)	VAS 2 (Pain)	VAS 2 (Dryness)	VAS 2 (satisfaction)	VAS 3 (Sensitivity)	VAS 3 (Pain)	VAS 3 (Dryness)	Discomfort	Taste changes	Flavor	Burning	Salivation	Color	Discomfort while rinsing	Dryness
1	F	47	III-B	CHX	6.5	6	6	B2	B2	B2	18	12	0	0	4	0	37	7	12	72	49	35	49	30	9	5.3	5.1	4.3	5.8	5.6	4.9	3	3	1	3	5	1	8	3	4	7	C	A	A	A	A	A	A	A
2	F	33	II-B	CHX	8	8	7	B2	C2	A2	278	22	2	77	19	0	138	23	0	51	43	20	60	51	42	3.1	2.6	2.6	3.1	2.6	2.6	7	6	5	6	0	8	7	7	0	7	A	A	A	A	A	A	A	E
3	F	72	III-B	CHX	6.5	6.5	7.5	C2	A3	A2	37	22	1	2	18	2	0	0	5	46	25	14	65	32	13	3.5	3.1	3	4	3.6	3.3	8	9	10	0	2	5	7	8	0	10	A	A	A	A	A	C	A	A
4	F	41	II-B	CHX	6.5	6.5	5.5	A4	A4	A4	0	1	0	0	0	0	0	0	0	39	20	5	41	16	5	2.6	2.6	2.4	2.6	2.6	2.6	8	9	8	5	3	7	7	5	0	6	C	B	B	C	A	C	C	C
5	M	53	II-B	CHX	7	7.5	7.5	C2	C3	A2	45	5	0	0	17	0	23	0	0	75	48	15	86	51	7	3.6	3.3	2.6	4.3	4.2	4.1	5	5	2	6	0	2	10	8	0	3	A	A	A	A	A	D	A	C
6	M	37	III-B	CHX	7	7	6.5	A4	B4	A2	917	93	2	607	87	0	143	8	6	60	41	22	53	66	13	3.8	3.5	3.1	4	3.7	3.7	0	7	0	6	0	0	8	8	0	0	a	a	a	c	a	a	c	a
7	M	63	III-C	C	6	6	6.5	C4	C4	A4	171	28	11	63	20	0	6	8	6	100	78	31	92	84	45	3.8	3.6	3	6.1	5.5	5.6	4	0	2	3	0	1	5	4	0	0	a	a	a	a	a	a	b	a
8	F	44	II-B	C	6	6	6	B2	A1	B1	6	13	7	0	0	0	0	0	13	31	5	3	31	22	22	2.9	2.6	2.6	3.8	3.4	3.6	6	1	0	0	0	0	9	5	0	0	a	a	a	a	b	a	a	a
9	M	53	III-B	C	6.5	7	7.5	D3	B3	C2	13	9	4	0	7	1	0	0	0	70	23	17	50	42	41	3.2	2.5	1.9	4.4	3.6	2.6	8	8	7	7	6	5	6	7	5	5	a	a	a	a	a	a	a	a
10	F	63	III-B	C	5.5	5.5	6	A1	A1	A1	0	0	13	19	2	7	0	11	0	45	11	8	96	19	23	3	2.4	2.5	3.8	3	3.3	7	9	9	7	9	9	8	7	0	9	a	a	a	a	a	c	a	a
11	M	43	III-C	C	7	7	7	A4	A3.5	A3.5	19	0	13	0	2	0	0	8	2	23	12	7	90	71	42	3	2.7	2.9	3.9	3.3	3.8	3	0	7	0	0	4	8	2	0	0	a	a	a	a	a	a	a	a
12	M	41	III-B	C	7.5	6	8	A1	A1	A1	40	8	0	44	7	1	0	0	0	76	52	29	65	23	15	3.8	3.6	3	4	3.8	3.7	8	7	0	4	0	0	8	8	1	0	a	a	a	a	b	a	a	a
13	F	45	III-B	C	7	6.5	7.5	B2	A1	A1	178	30	0	134	16	0	236	46	0	71	34	20	45	34	20	4.7	4.2	4.3	4.7	4.3	4.7	0	0	5	0	0	5	6	6	0	5	a	a	a	a	a	a	a	a
14	F	55	III-B	C	5.5	6	5.5	D3	A3	A3	0	18	0	0	1	0	0	13	0	39	25	17	81	17	13	3.5	2.9	3	4.6	3.6	4	8	7	8	8	2	6	7	5	0	10	c	a	a	a	b	a	a	c
15	F	67	III-B	C	7	7	7	C2	A2	A3	0	0	2	0	0	0	0	0	14	39	20	11	71	24	11	3.5	2.8	2.2	5	3.7	3.2	2	0	5	0	0	4	8	8	0	2	a	a	a	a	a	a	a	a
16	M	59	III-B	C	6.5	6.5	5.5	C2	C2	C2	15	27	15	0	8	0	15	12	0	48	23	5	65	26	2	3.6	3.2	2.9	4.2	3.7	3.5	3	7	1	1	0	0	10	0	0	0	a	a	a	a	a	a	a	a
17	M	45	III-B	CHX	6	7.5	6	A3	B3	B2	25	16	9	29	0	0	0	0	2	62	58	31	78	65	22	4	3.8	3.2	4.8	4.6	4.4	4	0	0	0	0	0	8	2	0	0	a	a	a	a	a	a	a	a
18	M	53	III-B	CHX	6.5	5.5	6.5	A2	A2	A2	78	0	9	0	3	0	0	1	0	69	52	26	88	74	50	2.9	2.7	2.6	4.7	4.5	4.7	9	1	2	7	8	8	9	6	5	3	d	a	a	a	a	e	a	e
19	M	66	III-B	CHX	6	6.5	6.5	C3	C3	C3	22	0	3	2	0	1	6	4	1	28	12	8	59	27	12	3.3	3.1	3.1	5	4.8	4.9	0	0	0	0	0	0	9	0	0	0	a	a	a	a	c	c	a	a
20	F	65	III-B	CHX	7	5	5.5	A3.5	B3	B3	0	15	0	0	0	0	0	0	0	23	18	10	78	51	42	3.3	2.9	2.7	4.7	4.3	3.5	7	0	5	5	0	10	8	6	3	10	a	a	a	a	a	c	a	e
21	M	59	III-C	A	6	6.5	6.5	B2	B2	B2	10	6	0	0	0	1	0	0	3	23	22	17	87	88	12	4.5	4.5	4	6.1	6	5.6	8	0	0	0	0	4	10	4	0	0	a	a	a	a	a	a	a	a
22	M	37	II-B	A	8.5	8	7.5	A3	A2	A2	63	18	0	85	45	0	34	12	0	44	43	16	64	64	45	3.1	3.2	2.6	3.2	3.3	2.7	3	0	1	5	0	3	8	1	0	0	a	a	a	a	a	a	a	a
23	F	54	III-B	A	8.5	8	8.5	A1	1	A1	0	9	0	9	3	0	0	2	0	28	23	21	35	34	13	2.8	2.8	2.4	3	3.1	2.7	6	1	0	3	0	1	3	8	0	2	a	a	a	a	a	a	a	a
24	F	65	III-B	A	7.5	7.5	6.5	D3	C3	D3	120	37	96	124	19	8	6	6	0	28	27	13	65	65	7	2.9	2.9	2.4	3.7	3.8	3.5	9	0	3	6	0	0	7	4	1	0	a	a	a	a	a	a	a	a
25	M	60	III-B	A	6.5	7	6	A2	A2	C2	0	23	0	3	3	0	5	1	0	35	31	14	65	55	23	3.3	3.3	2.6	5	5	4.8	9	3	10	9	0	0	10	7	0	9	a	a	a	a	a	a	a	a
26	F	42	III-B	A	6	6	6	B2	B2	B1	0	8	0	0	4	0	1	1	2	39	49	29	89	90	66	3.3	3.2	3	4.5	4.4	4.2	6	8	0	8	8	5	8	7	0	6	a	a	c	a	a	e	a	a
27	M	55	III-C	A	6.5	6.5	6.5	A3.5	A3.5	A3.5	21	25	0	30	15	0	5	1	0	67	78	40	91	92	45	3.4	3.5	3	5.2	5.4	5	7	0	0	5	6	0	10	5	6	0	a	a	a	a	d	a	a	b
28	F	59	III-B	A	6	5.5	6	A1	A1	A1	22	20	3	47	18	1	0	1	0	53	56	34	70	76	10	4.3	4.3	4	4.5	4.5	4.2	0	0	5	2	0	7	10	1	0	9	a	a	a	a	c	a	a	a
29	M	59	III-C	A	7	6.5	7	B3	B3	B3	0	13	0	3	9	10	0	0	0	41	39	15	70	67	50	4.5	4.4	3.8	6.4	5.7	6.1	4	7	5	5	5	6	9	5	6	8	b	d	a	a	a	a	a	a
30	F	48	III-B	A	6.5	6.5	7	A2	A2	A2	0	0	1	0	1	0	0	8	1	46	44	20	67	62	10	3.4	3.6	3.3	3.9	4.1	4.1	6	0	4	8	0	0	10	7	5	0	a	a	a	a	a	a	a	a
[truncated: 52 more columns]

## Sheet: Hoja1
Fecha	Codigo	Tipo de muestra	Enjuague
2022-12-20	MLM-13917-FC-2	Fluido crevicular
2022-12-20	MLM-13917-S1-2	Saliva
2022-12-20	MLM-13917-S2-2	Saliva
2022-12-20	NPA-13926-FC-2	Fluido crevicular
2022-12-20	NPA-13926-S1-2	Saliva
2022-12-20	NPA-13926-S2-2	Saliva
2022-12-21	MLCS-491-FC-2
2022-12-21	MLCS-491-S1-2
2022-12-21	MLCS-491-S2-2
2022-12-21	IAM-490-FC-2
2022-12-21	MLBPA-529-S1-1
2022-12-21	MLBA-529-S2-1
2022-12-21	MLBA-529-FC-1
2022-12-15	BLG-485-FC-2
2022-12-15	BLG-485-S2-2
2022-12-15	BLG-485-S2-1
2022-12-12	SRA-464-S1-2
2022-12-12	SRA-464-S2-2
2022-12-12	SRA-464-FC-2
2022-12-12	MDC-8732-S1-1
2022-12-12	MDC-8733-S2-1
2022-12-12	MDC-8733-FC-1
2022-12-12	JAMD-470-FC-1
2022-12-12	JAMD-470-S1-1
2022-12-12	JAMD-470-S2-1
2022-12-13	RLV-471-FC-2
2022-12-13	RLV-471-S2-2
2022-12-13	RLV-471-S1-2
2022-12-14	MPBT-468-S2-2
2022-12-14	MPBT-468-S1-2
2022-12-14	MPBT-468-FC-2
2022-12-15	JGS-492-S1-1
2022-12-15	JGS-492-S2-1
2022-12-15	JGS-492-FC-1
2022-01-25	MLBP-529-S1-2
2022-01-25	MLBP-529-S2-2
2022-01-25	MLBP-529-FC-2
2023-01-16	JAMD-470-FC-2
2023-01-16	JAMD-470-S1-2
2023-01-16	JAMD-470-S2-2
2023-01-13	FCV-487-S1-2
2023-01-13	FCV-487-S2-2
2023-01-13	FCV-487-FC-2
2023-01-12	MDC-8732-S1-2
2023-01-12	MDC-8732-S2-2
2023-01-12	MDC-8732-FC-2
2023-01-12	RLV-471-S1-3
2023-01-12	RLV-471-S2-3
2023-01-12	RLV-471-FC-3
2023-02-07	MMDD-484-S1-3
2023-02-07	MMDD-484-S2-3
2023-02-07	MMDD-484-FC-3
2023-02-16	MDC-8732-S1-3
2023-02-16	MDC-8732-S2-3
2023-02-16	MDC-8732-FC-3
2023-02-14	MLCS-491-S1-3
2023-02-14	MLCS-491-S2-3
2023-02-14	MLCS-491-FC-3
2023-02-07	SRA-464-S1-3
2023-02-07	SRA-464-FC-3
2023-02-07	OVV-474-FC-3
2023-02-07	OVV-474-S1-3
2023-02-07	OVV-474-S2-3
2023-02-08	RTC-486-S1-2
2023-02-08	RTC-486-S2-2
2023-02-08	RTC-486-FC-2
2023-02-08	MPBT-468-S2-3
2023-02-08	MPBT-468-S1-3
2023-02-08	MPBT-468-FC-3
2023-03-06	PLSC-57-FC-1
2023-03-06	PLSC-57-S1-1
2023-03-06	PLSC-57-S2-1
2023-02-27	IAM-490-FC-3
2023-02-27	IAM-490-S1-3
2023-02-27	IAM-490-S2-3
2023-02-28	MLBP-529-FC-3
2023-02-28	MLBP-529-S1-3
2023-02-28	MLBP-529-S2-3
2023-03-09	NPA-475-FC-3
2023-03-09	NPA-475-S1-3
2023-03-09	NPA-475-S2-3
2023-03-09	MLM-469-S2-3
2023-03-09	MLM-469-S2-3
2023-03-09	MLM-469-FC-3
2023-03-07	RTC-486-S1-3
2023-03-07	RTC-486-S2-3
2023-03-07	RTC-486-FC-3
2023-03-06	MCG-481-FC-3
2023-03-06	MCG-481-S1-3
2023-03-06	MCG-481-S2-3
2023-03-02	BLG-485-S1-3
2023-03-02	BLG-485-S2-3
2023-03-02	BLG-485-FC-3
2023-03-01	FCV-487-S1-3
2023-03-01	FCV-487-S2-3
2023-03-01	FCV-487-FC-3
2023-03-09	JAMD-470-S1-3
2023-03-09	JAMD-470-S2-3
2023-03-09	JAMD-470-FC-3
2023-03-07	ETE-58-S1-1
2023-03-07	ETE-58-S2-1
2023-03-07	ETE-58-FC-1
2023-03-23	JJPDB-75-S1-1
2023-03-23	JJPDB-75-S2-1
2023-03-23	JJPDB-75-FC-1
2023-03-22	JMS-73-S1-1
2023-03-22	JMS-73-S2-1
2023-03-22	JMS-73-FC-1
2023-03-22	MJLC-67-S1-1
2023-03-22	MJLC-67-S2-1
2023-03-22	MJLC-67-FC-1
2023-03-29	ACCG-66-S1-1
2023-03-29	ACCG-66-S2-1
2023-03-29	ACCG-66-FC-1
2023-03-27	MLF-147-S1-1
2023-03-27	MLF-147-S2-1
2023-03-27	MLF-147-FC-1
2023-03-23	ECF-80-S1-1
2023-03-23	ECF-80-S2-1
2023-03-23	ECF-80-FC-1
2023-03-21	DGD-7088-S1-1
2023-03-21	DGD-7088-S2-1
2023-03-21	DGD-7088-FC-1
2023-03-30	SFB-62-S1-1
2023-03-30	SFB-62-S2-1
2023-03-30	SFB-62-FC-1
2023-04-20	DGD-7088-FC-2
2023-04-20	DGD-7088-S1-2
2023-04-20	DGD-7088-S2-2
2023-04-27	ACCG-66-FC-2
2023-04-27	ACCG-66-S1-2
2023-04-27	ACCG-66-S2-2
2023-04-21	PLSC-57-S1-2
2023-04-21	PLSC-57-S2-2
2023-04-21	PLSC-57-FC-2
2023-04-21	ETE-58-FC-2
2023-04-21	ETE-58-S1-2
2023-04-21	ETE-58-S2-2
2023-04-24	JMS-73-FC-2
2023-04-24	JMS-73-S1-2
2023-04-24	JMS-73-S2-2
2023-04-20	MJLC-67-FC-2
2023-04-20	MJLC-67-S1-2
2023-04-20	MJLC-67-S2-2
2023-04-27	BMR-150-FC-1
2023-04-27	BMR-150-S1-1
2023-04-27	BMR-150-S2-1
2023-04-20	ECF-80-FC-2
2023-04-20	ECF-80-S1-2
2023-04-20	ECF-80-S2-2
2023-04-26	MLF-147-FC-2
2023-04-26	MLF-147-S1-2
2023-04-26	MLF-147-S2-2
2023-04-27	SFB-62-FC-2
2023-04-27	SFB-62-S1-2
2023-04-27	SFB-62-S2-2
2023-04-25	JJPDB-75-FC-2
2023-04-25	JJPDB-75-S1-2
2023-04-25	JJPDB-75-S2-2
2023-04-25	MBI-7703-FC-1
2023-04-25	MBI-7703-S1-1
2023-04-25	MBI-7703-S2-1
2023-04-20	CSF-69-FC-1	CSF-59-FC-1
2023-04-20	CSF-69-S2-1
2023-04-20	CSF-69-S1-1
2023-05-30	JJPDB-75-S1-3
2023-05-30	JJPDB-75-S2-3
2023-05-30	JJPDB-75-FC-3
2023-05-30	BMR-150-S1-2
2023-05-30	BMR-150-S2-2
2023-05-30	BMR-150-FC-2
2023-07-13	ACCG-66-FC-3
2023-07-13	ACCG-66-S1-3
2023-07-13	ACCG-66-S2-3
2023-06-26	MBI-7703-FC-3
2023-06-26	MBI-7703-S1-3
2023-06-26	MBI-7703-S2-3
2023-06-15	PLSC-57-S1-3
2023-06-15	PLSC-57-S2-3
2023-06-15	PLSC-57-FC-3
2023-05-29	SFB-62-S2-3
2023-05-29	SFB-62-S1-3
2023-05-29	SFB-62-FC-3
2023-06-21	ECF-80-FC-3
2023-06-21	ECF-80-S1-3
2023-06-21	ECF-80-S2-3
2023-06-28	BMR-150-FC-2
2023-06-28	BMR-150-FC-2
2023-06-28	BMR-150-FC-2
2023-05-25	MJRS-190-S1-1
2023-05-25	MJRS-190-S2-1
2023-05-25	MJRS-190-FC-1
2023-06-28	MJRS-190-FC-2
2023-06-28	MJRS-190-S2-2
2023-06-28	MJRS-190-S1-2
2023-05-29	DGD-7088-S1-3
2023-05-29	DGD-7088-S2-3
2023-05-29	DGD-7088-FC-3
2023-05-25	CSF-69-FC-2
2023-05-25	CSF-69-S1-2
2023-05-25	CSF-69-S2-2
2023-06-12	ETE-58-FC-3
2023-06-12	ETE-58-S1-3
2023-06-12	ETE-58-S2-3
2023-05-29	JMS-73-S1-3
2023-05-29	JMS-73-S2-3
2023-05-29	JMS-73-FC-3
2023-06-22	MLF-147-S1-3
2023-06-22	MLF-147-S2-3
2023-06-22	MLF-147-FC-3
2023-06-21	MJLC-67-FC-3
2023-06-21	MJLC-67-S1-3
2023-06-21	MJLC-67-S2-3
2023-05-31	MBI-7703-FC-2
2023-05-31	MBI-7703-S1-2
2023-05-31	MBI-7703-S2-2
